# Supplementary material
Source: Springer Nature journal article supplement (https://www.springermedizin.de/resource/supplementary/12888_2009_595_MOESM1_ESM.pdf/9483684)
Supplement: MOESM1 [file 9483684]

## Additional File 1

**Table 1 - Key Search Terms**

| <b>Depression</b>                                                                                                                  | <b>Psychosis</b>                                                                                                                                                                                                                   | <b>Suicidal thoughts &amp; behaviours</b>                                                                                                            | <b>Deliberate self-injury</b>                                                                                                      | <b>Trauma and loss</b>                                                                                         |
|------------------------------------------------------------------------------------------------------------------------------------|------------------------------------------------------------------------------------------------------------------------------------------------------------------------------------------------------------------------------------|------------------------------------------------------------------------------------------------------------------------------------------------------|------------------------------------------------------------------------------------------------------------------------------------|----------------------------------------------------------------------------------------------------------------|
| Aboriginal<br>Indigenous                                                                                                           | Aboriginal<br>Indigenous                                                                                                                                                                                                           | Aboriginal<br>Indigenous                                                                                                                             | Aboriginal<br>Indigenous                                                                                                           | Aboriginal<br>Indigenous                                                                                       |
| Early Intervention<br>Help<br>First Aid                                                                                            | Early Intervention<br>Help<br>First Aid                                                                                                                                                                                            | Early Intervention<br>Help<br>First Aid                                                                                                              | Early Intervention<br>Help<br>First Aid                                                                                            | Early Intervention<br>Help<br>First Aid                                                                        |
| Depression<br>clinical<br>depression<br>major depressive<br>disorder<br>depression<br>carers<br>support<br>depression<br>sufferers | Psychosis<br>first-episode psychosis<br>psychosis family friends<br>psychosis carer<br>Schizophrenia<br>Schizophrenia carer<br>hearing voices, hallucinations,<br>delusions<br>psychosis violence<br>what to do psychosis violence | Suicide, suicidal,<br>suicidality<br>help for suicide<br>suicide intervention<br>suicide family<br>friends<br>suicidal ideation<br>suicide behaviour | Self harm, self injury<br>non-suicidal self<br>injury<br>deliberate self harm,<br>deliberate self injury<br>parasuicide<br>cutting | Trauma<br>trauma excluding wounds or<br>injuries<br>post-traumatic stress disorder<br>PTSD<br>stress disorders |
